# Supplementary material for: Conjunctival Acute Graft-versus-Host Disease in Adult Patients Receiving Allogeneic Hematopoietic Stem Cell Transplantation: A Cohort Study
Source: PLoS One. 2016 Nov 30;11(11):e0167129. doi: 10.1371/journal.pone.0167129 (PMC5130243; doi:10.1371/journal.pone.0167129)
Supplement: S1 Data — Data of patients with conjunctival acute graft-versus-host disease. (XLS) [file pone.0167129.s002.xls]

## Sheet: Sheet1
Patient No.	Gneder	Age at HSCT	Acute Conjunctival GVHD	Conjunctival aGVHD (stage)	Pseudomenbrane formation	Diagnosis	Transplant type	Disease relapse after HSCT	Conditioning	ECOG after HSCT	EMBT risk	Death (1)	aGVHD stage	aGVHD grade	cGVHD score	CMV reactivation before pseudomenbrance	Follow-up after HSCT (days)	Conjunctival aGVHD detected after HSCT or DLI (days)
1	F	57	1	4	1	Nasal NK/T-cell lymphoma	unrelated	1	CyTBI	1	6	1	skin/mucosa: IV	4	mucosa/skin: 3	1	288	72
2	F	35	1	3	1	AML	slibling	0	Bu-Mel	1	3	0	skin/GI: III	3	mucosa/skin: 3	1	198	85
3	F	27	1	3	1	ALL	unrelated	1	Bu-Flu	1	2	0	skin/GI: IV	4	no	1	207	33
4	F	24	1	3	1	AML	unrelated	0	BuCy2	1	4	0	GI: II / skin: I	3	mucosa/skin: 2	1	309	20
5	M	42	1	3	1	AML	slibling	0	CyTBI	1	4	0	GI: II	3	no	1	345	142
6	F	40	1	3	1	DLBCL	unrelated	1	BuCy2	2	4	1	skin/GI: II	3	mucosa/eye/skin: 3	1	261	64
7	F	59	1	3	1	AML	unrelated	0	BuCy2	1	5	1	skin: II	1	no	0	90	59
8	M	58	1	3	1	AML	slibling	0	Bu-Flu	1	2	0	skin: II	1	skin/lung: 3; Gut: 2; eye: 1	0	741	128
9	F	57	1	2	0	AML	unrelated	0	Mel-Flu	1	3	0	skin: IV	4	eye/skin: 2; liver: 3	1	579	109
10	M	27	1	1	0	AML	unrelated	0	BuCy2	1	5	1	skin/liver: II	3	liver/gut: 3; eye/skin: 1	1	249	112
11	M	24	1	1	0	ALL	slibling	0	CyTBI	0	1	0	skin/GI: II	3	eye/skin: 1	0	1072	52
12	F	47	1	1	0	MM	unrelated	0	CyTBI	1	5	0	skin/GI: II	3	eye/skin: 1	1	1097	41
13	F	58	1	1	0	AML	unrelated	1	Mel-Flu	1	5	1	skin/GI: I	2	no	1	67	56
